# Supplementary material
Source: PubMed Central journal article supplement (PMC3065874)
Supplement: bi200065g_si_001.pdf [file bi200065g_si_001.pdf]

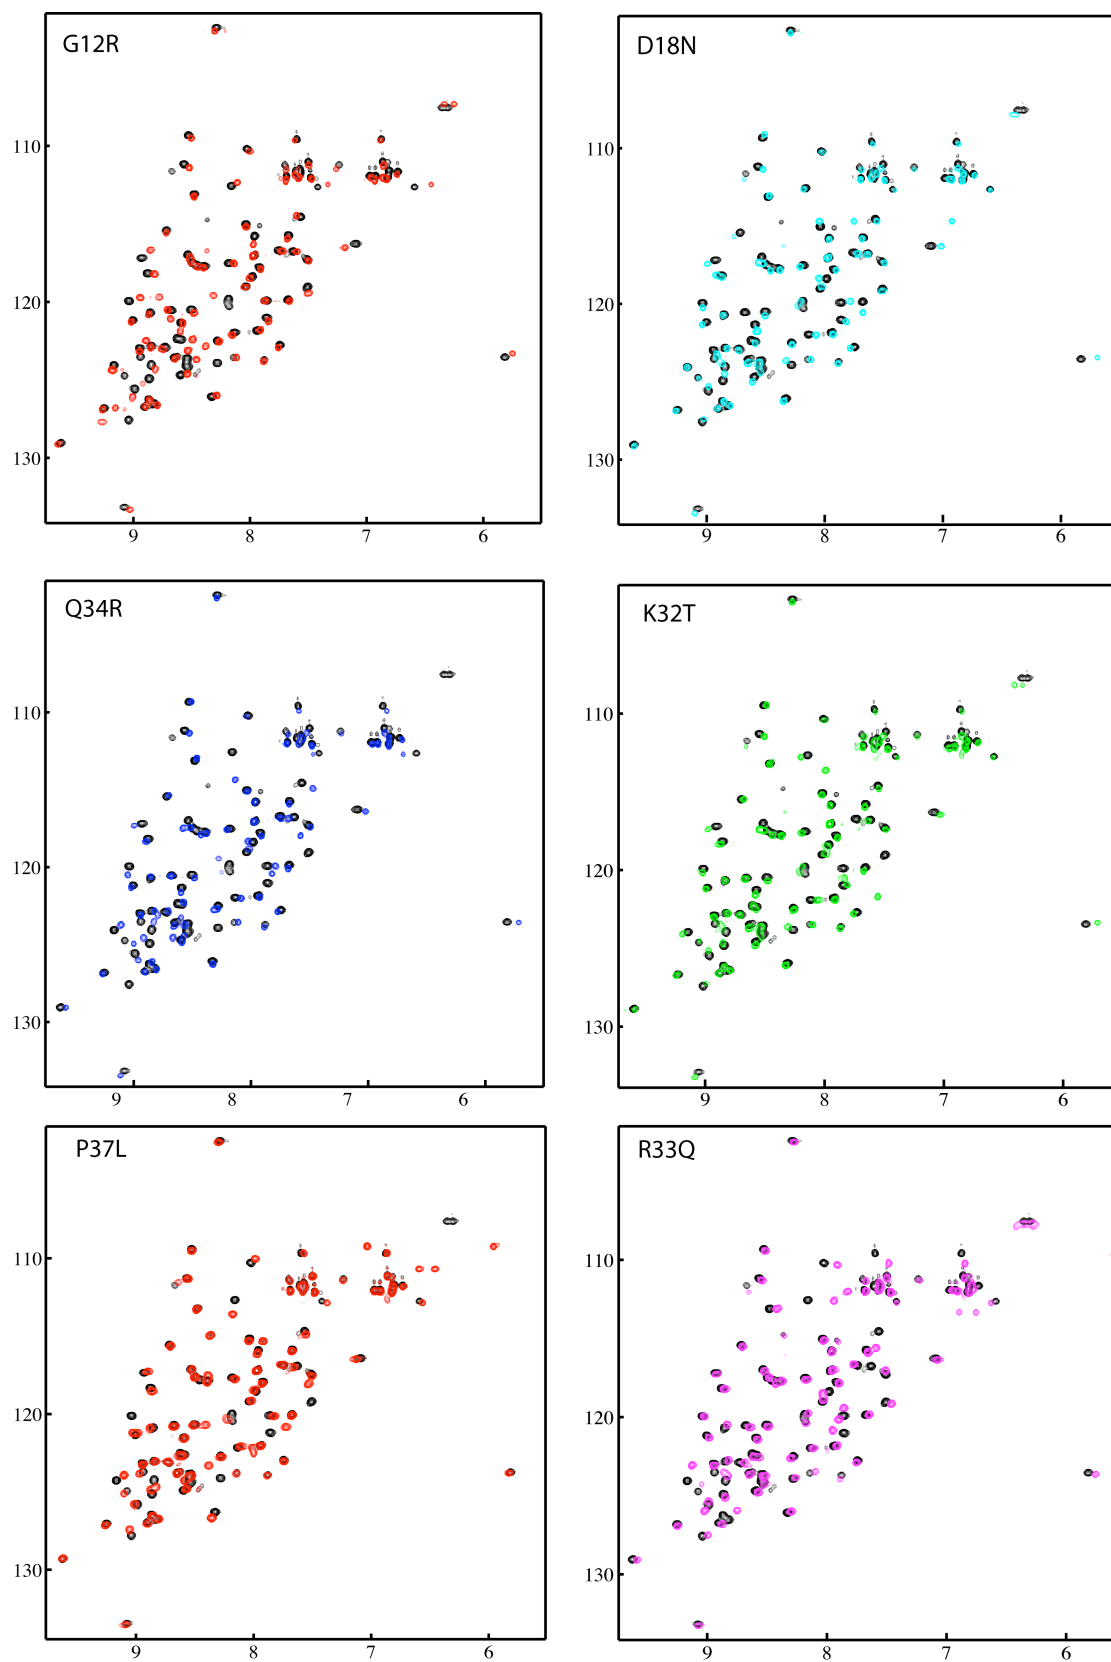

Figure S1.  $^1\text{H}$ - $^{15}\text{N}$  HSQC spectra of selected substituted Ubld proteins. All spectra were acquired on a Varian Inova 600 MHz NMR spectrometer at 25 °C. Protein concentrations were approximately 800  $\mu\text{M}$  in 10 mM  $\text{KH}_2\text{PO}_4$ , 1 mM EDTA, 1 mM DTT at pH 7.0.
